# Supplementary material for: Acylated anthocyanins derived from purple carrot (Daucus carota L.) induce elevation of blood flow in rat cremaster arteriole
Source: Royal Society of Chemistry journal article supplement (doi:10.1039/c8fo02125b), 2019-01-01
Supplement: c8fo02125b1.pdf [file c8fo02125b1.pdf]

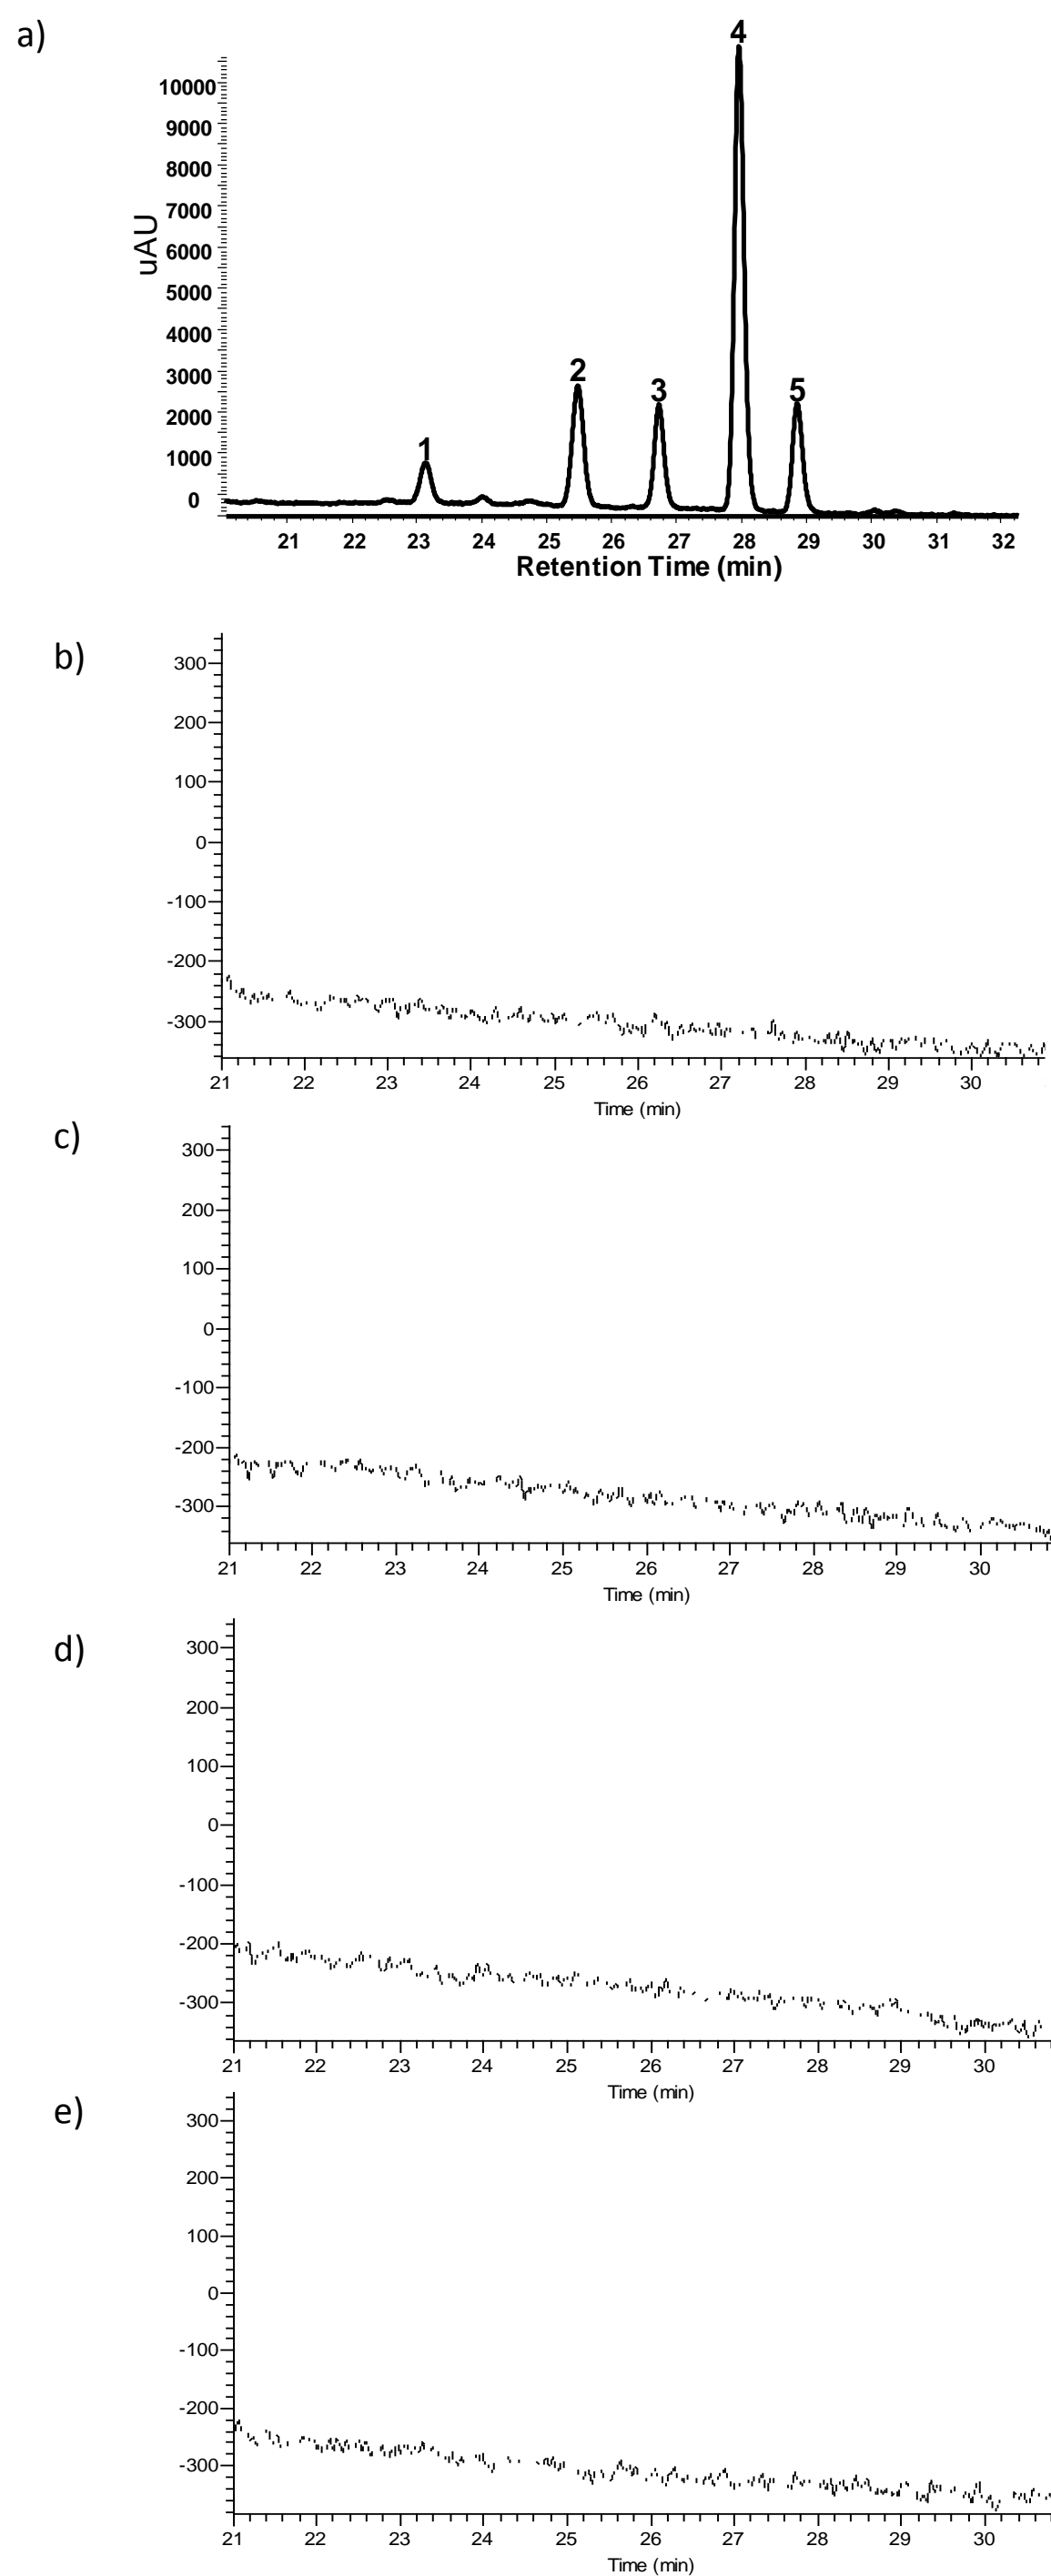

Sfig.1 HPLC chromatograms of plasma after a single dose of 10 mg/kg PCA.. (1) Cyanidin-3-(2''-xylose- 6-glucose-galactoside)(C3XGG), (2) Cyanidin-3-(2''-xylose-galactoside)(C3XG), (3) Cyanidin-3- (2''-xylose-6''-sinapoyl-glucose-galactoside)(C3XSGG), (4) Cyanidin-3-(2''-xylose-6''-feruloyl-glucose -galactoside)(C3XFGG), (5) Cyanidin-3-(2''-xylose-6''(4-coumaroyl)glucose-galactoside)(C3XCGG). PCA fraction using the present study (a), typical chromatograph of plasma;; before treatment (b), 15 min (c), 30 min after (d), 60 min after treatment.
